# Supplementary material for: A genome-wide investigation of microsatellite mismatches and the association with body mass among bird species
Source: PubMed Central journal article supplement (PMC5857172; doi:10.7717/peerj.4495), 2018-03-14
Supplement: peerj-06-4495-s002.pdf [file peerj-06-4495-s002.pdf]

#NEXUS

BEGIN TREES;

TRANSLATE

- 1 Picoides\_pubescens,
- 2 Merops\_nubicus,
- 3 Buceros\_rhinoceros,
- 4 Apaloderma\_vittatum,
- 5 Leptosomus\_discolor,
- 6 Colius\_striatus,
- 7 Tyto\_alba,
- 8 Haliaeetus\_leucocephalus,
- 9 Haliaeetus\_albicilla,
- 10 Cathartes\_aura,
- 11 Lonchura\_striata,
- 12 Taeniopygia\_guttata,
- 13 Passer\_domesticus,
- 14 Geospiza\_fortis,
- 15 Sturnus\_vulgaris,
- 16 Phylloscopus\_trochilus,
- 17 Zosterops\_lateralis,
- 18 Parus\_major,
- 19 Corvus\_brachyrhynchos,
- 20 Lepidothrix\_coronata,
- 21 Manacus\_vitellinus,
- 22 Acanthisitta\_chloris,
- 23 Agapornis\_roseicollis,
- 24 Amazona\_aestiva,
- 25 Nestor\_notabilis,
- 26 Melopsittacus\_undulates,
- 27 Falco\_peregrinus,
- 28 Cariama\_cristata,

29 Pelecanus\_crispus,  
30 Egretta\_garzetta,  
31 Nipponia\_nippon,  
32 Phalacrocorax\_carbo,  
33 Pygoscelis\_adeliae,  
34 Aptenodytes\_forsteri,  
35 Fulmarus\_glacialis,  
36 Gavia\_stellata,  
37 Phaethon\_lepturus,  
38 Eurypyga\_helias,  
39 Uria\_lomvia,  
40 Charadrius\_vociferous,  
41 Grus\_japonensis,  
42 Balearica\_regulorum,  
43 Gallirallus\_okinawae,  
44 Opisthocomus\_hoazin,  
45 Chaetura\_pelagica,  
46 Calypte\_anna,  
47 Antrostomus\_carolinensis,  
48 Tauraco\_erythrolophus,  
49 Chlamydotis\_macqueenii,  
50 Cuculus\_canorus,  
51 Pterocles\_gutturalis,  
52 Mesitornis\_unicolor,  
53 Patagioenas\_fasciata,  
54 Columba\_livia,  
55 Podiceps\_cristatus,  
56 Phoenicopterus\_rubber,  
57 Gallus\_gallus,  
58 Meleagris\_gallopavo,  
59 Callipepla\_squamata,

- 60 Numida\_meleagris,
  - 61 Anser\_brachyrhynchus,
  - 62 Anser\_cygnoides,
  - 63 Anas\_platyrhynchos,
  - 64 Struthio\_camelus,
  - 65 Tinamus\_major
- ;

TREE \* 65birds=

```

((((((((7:61.649200,(6:59.941898,(5:58.571899,(4:55.095600,(3:51.984901,(1:42.341801,2:4
2.341801):9.643100):3.110700):3.476300):1.370000):1.707300):1.122800,(10:60.349098,(8:
5.992200,9:5.992200):54.356899):2.422900):0.703100,(28:62.102901,(27:59.992901,((22:38
.477901,((19:20.525999,(15:11.824519,((11:6.839130,12:6.839130):3.076270,(13:6.714970,
14:6.714970):3.200430):1.909119):1.994549,(18:12.449678,(16:1.897191,17:1.897191):10.5
52487):1.369390):6.706832):11.291000,(20:8.647782,21:8.647782):23.169218):6.660900):1
5.977700,((23:20.050646,24:20.050646):18.246998,(25:28.866301,26:28.866301):9.431343):
16.157957):5.537300):2.110000):1.372300):1.968400,((36:62.800800,((32:58.922100,(31:57.
558201,(29:55.242599,30:55.242599):2.315600):1.363900):2.429900,(35:59.986401,(33:22.9
98301,34:22.998301):36.987999):1.365700):1.448700):1.724500,(37:60.021000,38:60.02100
0):4.504300):0.918200):1.291100,(44:65.928596,((39:56.248158,40:56.248158):8.327242,(4
3:49.824833,(41:17.742760,42:17.742760):32.082073):14.750566):1.353200):0.806000):1.21
4800,((47:62.939602,(45:43.651402,46:43.651402):19.288200):3.798700,(50:64.898003,(48:
62.256199,49:62.256199):2.641800):1.840300):1.211100):1.244000,(((51:61.612000,52:61.6
12000):3.996100,(53:23.883490,54:23.883490):41.724609):2.513200,(55:56.331799,56:56.3
31799):11.789500):1.072100):19.377899,((60:39.572037,(59:36.005951,(57:27.912201,58:2
7.912201):8.093750):3.566088):26.211163,(63:18.214306,(61:0.604714,62:0.604714):17.609
591):47.568893):22.788099):13.067100,(64:83.763603,65:83.763603):17.874901);

```

ENDBLOCK;
