# Supplementary material for: A genome-wide investigation of microsatellite mismatches and the association with body mass among bird species
Source: PubMed Central journal article supplement (PMC5857172; doi:10.7717/peerj.4495), 2018-03-14

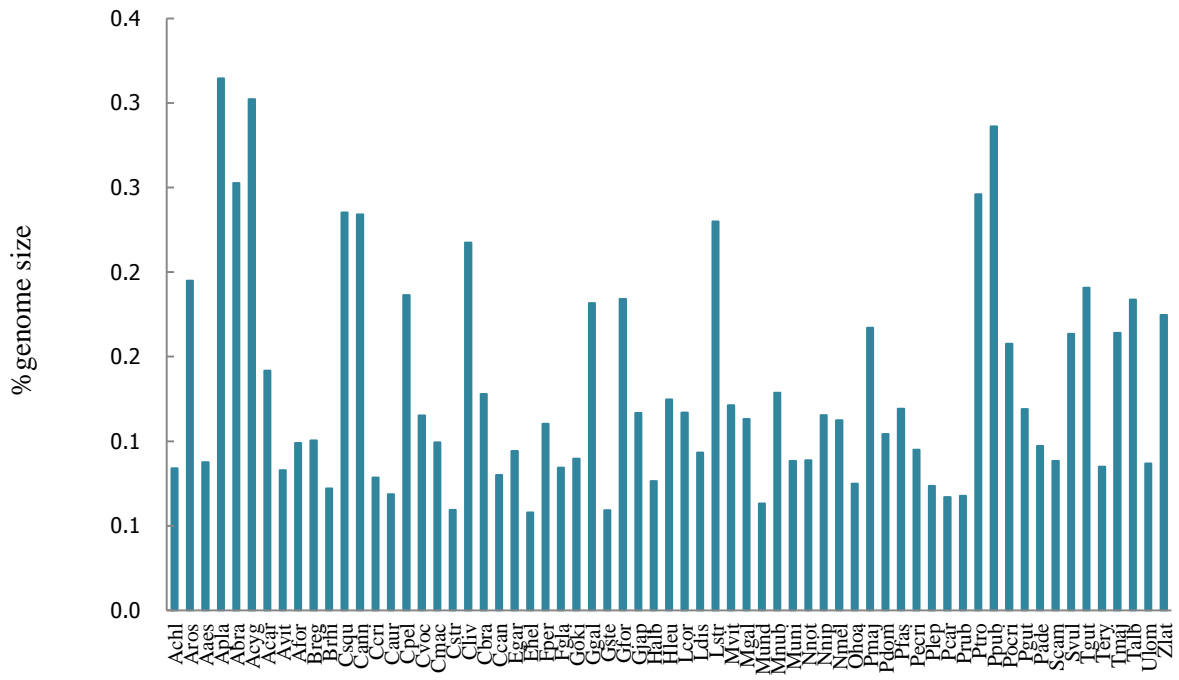

Supplement: peerj-06-4495-s004.pdf [file peerj-06-4495-s004.pdf]
